# Supplementary material
Source: Research Square preprint supplement (doi:10.21203/rs.3.rs-9192593/v1)
Supplement: Supplementary file 2 [file 2f8641cdffef6573ac0bbb7a.xlsx]

## Sheet: Reviewer 1
Study ID	Author(s)	Year	Title	State	Type of document	Study aim(s)	Donor Name	Name of Intervention/Program	Role of the funds	Outcome of intervention/Program	Impact	Summary of main findings	Reported challenges/barriers
1	Andrew T. Boyd, Obinna Ogbanufe, Chibuzor Onyenuobi, Ifunanya Mgbakor, Pamela Bachanas, Olayemi Olupitan, Clifford Umeh, Adeoye Adegboye, Golden Owhonda, Solomon Odate, Ibrahim Jahun, Patrick Dakum, Charles Mensah, Jerry Gwamna, Dennis Onotu, Emilio Dirlikov, Michelle Williams-Sherlock, Chukwuemeka Okolo, Tarfa Verinume, Stanley Idakwo, Makshwar U. Kumtap, Tedd Ellerbrock, Mahesh Swaminathan	2021	Scale-up of antiretroviral treatment access among people living with HIV in Rivers State, Nigeria, 2019–2020	Rivers State, Nigeria	Research Article	The aim of this study was to describe and evaluate the impact of the programme intervention of the Rivers State Antiretroviral Treatment (ART) Surge, a collaboration between the US President’s Emergency Plan for AIDS Relief (PEPFAR) and the State Ministry of Health, to increase HIV case-finding and ART access in Rivers State, the state with the largest ART gap among people living with HIV (PWH) i…	PEPFAR	Rivers State ART Surge	PEPFAR has supported the Government of Nigeria in providing HIV services, including ART, through technical assistance and direct funding of implementing partners, since 2004.	During May 2019—September 2020, the weekly number of newly diagnosed PWH initiated on ART supported by PEPFAR in Rivers State increased from 82 to 1723. During April 2019—September 2020, the total number of PWH on ART supported by PEPFAR statewide increased by 3.8 times, from 26 041 to 99 733.	The total number of PWH on ART supported by PEPFAR statewide increased by 3.8 times; The strategies applied by HIV program stakeholders contributed to scale-up of PWH identification and ART linkage within the Rivers State ART Surge.	The Rivers State ART Surge implemented six strategies to increase HIV case-finding and ART access, resulting in a significant increase in PWH on ART from 26,041 to 99,733. The intervention used data-driven approaches and stakeholder engagement to achieve scale-up.	The magnitude of the proposed scale-up was considerably larger than historic PEPFAR programme achievement in Rivers State; Variability in HIV prevalence and ART coverage across states requiring tailored strategies.
2	Ashley Grosso, Owen Ryan, Khai Hoan Tram, Stefan Baral	2015	Financing the response to HIV among gay men and other men who have sex with men: Case studies from eight diverse countries	Ethiopia, Mozambique, Guyana, India, Nigeria, China, Ukraine, Vietnam	Case Study	This study characterises financing of HIV programmes for MSM and the impact of criminalisation on levels of funding, using data from five countries that criminalise same-sex sexual practices (Ethiopia, Mozambique, Guyana, India and Nigeria) and three that do not (China, Ukraine and Vietnam).	Global Fund, PEPFAR	HIV programmes for men who have sex with men (MSM)	All publicly available documents from the Global Fund to Fight AIDS, Tuberculosis and Malaria for approved HIV/AIDS grants in Rounds 5–9 and Country Operational Plans detailing investments made through the President’s Emergency Plan for AIDS Relief (PEPFAR) from US fiscal year (FY) 2007–2009 were examined.	Eleven of 20 HIV proposals to the Global Fund contained programmes for MSM totalling approximately $40 million or 6% of proposed budgets. In six countries providing activity-level data on MSM programming, PEPFAR funding that served this population and others ranged from $23.3 million in FY2007 to $35.4 million in FY2009, representing 0.5–25.9% of overall, non-treatment funding over this period.	Countries that criminalise same-sex sexual practices spend fewer resources on HIV programmes serving MSM. However, they also show consistent underfunding of programmes serving MSM regardless of context or geography.	Despite global reductions in new HIV infections, the epidemic among MSM is expanding. The study found low levels of funding for MSM-specific HIV programs in the examined countries, with criminalisation associated with even lower funding, but underfunding persistent across contexts.	Criminalisation of same-sex sexual practices leads to lower funding for MSM programs; Consistent underfunding of MSM programs regardless of whether same-sex practices are criminalised; Barriers to engaging MSM due to structural factors like poverty and inequality.
3	Florence Femi Odekunle, Raphael Oluseun Odekunle	2016	The impact of the US president's emergency plan for AIDS relief (PEPFAR) HIV and AIDS program on the Nigerian health system	Nigeria	Seminar	To present the impacts of PEPFAR HIV/AIDS program on the Nigerian health system using the World Health Organization (WHO) health system six building blocks.	PEPFAR	PEPFAR HIV/AIDS program	PEPFAR is centrally managed by the Office of the US Global AIDs Coordinator (OGAC) in conjunction with other United States Government (USG) agencies. In Nigeria, the PEPFAR initiative is coordinated by three USG agencies, namely: USAID, the Centers for Disease Control and prevention (CDC), and the Defense Department. Huge resources have been brought into countries including Nigeria for HIV/AIDS p…	The PEPFAR HIV/AIDS program has improved the delivery of prevention and care services for PLWHA. Many lives have been saved through this treatment. The number of PLWHA receiving HAART (highly active antiretroviral therapy) has gone up. The treatment has freed up hospital bed spaces which can be used for other purposes.	Improved service delivery including free ART, counseling, laboratory services, and PMTCT; Increased political awareness and priority for public health; Benefits to health workforce by preserving lives and providing training; Improved information sharing; Improvements in logistics and supply systems for ART and laboratory materials.	The PEPFAR HIV/AIDS program has had noticeable positive and negative impacts on the Nigerian health system across WHO's six building blocks: service delivery, health workforce, information, medical products and technologies, financing, and governance. Positive impacts include improved access to free ART, enhanced health workforce skills and morale, increased resources, better information sharing,…	Donor dependency syndrome; Non-alignment with recipient country's health system; Distraction from coordinated efforts to strengthen health systems; Attention shift from maternal mortality and reproductive health; Top-down planning; Imposition of donor policies like ABC; Brain drain to NGOs; Burden of duplicative reporting; Use of only patented medications increasing costs.
4	David Ochedomi Ekele, Inichinbia Boniface, Bonaventure Michael Ukoaka, Otoyoy Toyo, Uduak Akpan, Esther Nwanja, Kolawole Olatunbosun, Augustine Idemudia, Pius Nwaokoro, Onwah Ogheneuzauzo, Nkemjika Uwakwe, Hope Udokor, Dolapo Ogundehin, Ezekiel James, Abutu Inedu, Adeoye Adegboye, Okezie Onyedinachi, Andy Eyo	2025	Transitioning a large-scale HIV/AIDS treatment program from an international partner to a local Nigerian implementing partner: a before-after early outcomes assessment study	Akwa Ibom and Cross River States, Nigeria	Research Article	This study evaluates the transition of a large-scale HIV/AIDS program from an international implementing partner (FHI 360) to a local partner, Excellence Community Education Welfare Scheme (ECEWS) in Nigeria, highlighting the processes and early outcomes.	PEPFAR / USAID	Accelerating Control of the HIV Epidemic in Nigeria (ACE) awards; Meeting Targets and Maintaining Epidemic Control (EpiC) bridge project transitioned to ACE-5 project	USAID adopted a three-month phased transition from May to July 2022 to allow for a gradual service transfer and minimize disruptions to clients' treatment. The outgoing partner provided high-level technical assistance to ensure a seamless transition of services, with a focus on critical areas such as financial management, service delivery, asset transfer, and the migration of client and program d…	Between January and December 2022, a total of 405,702 individuals were tested for HIV, with 116,138 (29%) tested before and 289,564 (71%) tested after the transition period. The average number of monthly tests increased by 149%, from 19,356 to 48,260 (p = 0.001). On-schedule refill appointments improved significantly post-transition, increasing from 97.8 to 98.2% (p < 0.001). Viral load testing u…	149% increase in monthly HIV tests; 0.4% improvement in on-schedule ART refills; 3% increase in viral load testing uptake immediately post-transition.	The study used a before-after design to evaluate the transition of HIV services from FHI 360 to ECEWS in Akwa Ibom and Cross River States. Key outcomes showed a 149% increase in monthly HIV testing, improved on-schedule ART refills from 97.8% to 98.2%, and viral load testing uptake from 96% to 99%. Success was attributed to comprehensive planning, stakeholder engagement, flexible communication, a…	Short transition timelines and poor communication in similar transitions elsewhere; Logistical challenges like patient reallocation and staff adjustment; Staff turnover among ancillary workers; Short-term focus limiting assessment of long-term impacts; Lack of qualitative perspectives from care recipients; Parallel activities potentially confounding results.
5	Kazeem Adefemi, Caroline Yates, Olusegun Awolaran, Joseph Bakare	2017	Effects of donor HIV/AIDS funding on primary healthcare delivery in southwest Nigeria: Evidence from hospital administrators	Southwest Nigeria	Research Article	This qualitative research explores the effect of a decade of donor HIV/AIDS funding on health services in southwest Nigeria, through the experiences of hospital administrators.	PEPFAR, GFATM, World Bank's MAP	Donor-funded HIV/AIDS programs	Dramatic increase in international aid for health, with HIV-specific funding increasing from US$292 million in 1996 to $13.7 billion in 2009. This has resulted in large influx of funds to developing countries like Nigeria.	HIV programs have improved professional development, contributed toward infrastructural upgrade, and improved the quality and coverage of HIV services.	Improvements in laboratory equipment and skills; Increased professional training and motivation; Integration of HIV services into primary care; But also increased workload, diversion of resources, and discriminatory incentives.	The study found diverse experiences with HIV/AIDS funding in southwest Nigeria. Major themes include differences in program implementation (incentives, recruitment, lab improvements, infrastructure attitudes); Changes in work practices (increased workload, management strategies, improved HIV service quality); Effects on personnel availability (integration, resource diversion, workload without add…	Differences in incentives causing perceptions of discrimination; Inconsistent support for infrastructure and maintenance; Increased workload without additional personnel or commensurate pay; Loss of staff to better-paying NGO jobs; Diversion of time and resources from other services; Inconsistencies in policies and structures across facilities.
6	Abdulsamad Salihu, Ibrahim Jahun, David Olusegun Oyedeji, Wole Fajemisin, Omokhudu Idogho, Samira Shehu, Aminu Yakubu, Jennifer Anyanti	2025	Scaling up access to antiretroviral treatment for HIV: lessons from a key populations program in Nigeria	Nigeria (multiple states including Lagos, Rivers, Akwa Ibom, Benue, Cross River, Nasarawa, FCT, Oyo, Anambra, Imo, Edo, Gombe, Kano, Enugu)	Review article/Case study	To share experiences in the transformation of SFH into a comprehensive HIV prevention, treatment, and care service provider as lessons for organizations with similar objectives	PEPFAR (via USAID), Global Fund to Fight AIDS, TB, and Malaria (GFATM)	Key Population Investment Fund (KPIF); SHiPS for MARPs; KP CARE 2; SFH's transformation to comprehensive HIV services including One-Stop Shops (OSS) and KP-friendly facilities	Fund the transformation from prevention-only to comprehensive services, establish and upgrade facilities (OSS and KP-friendly ART sites), capacity building, community engagement, and program implementation to address KP needs	Between 2016-2017, identified 4532 HIV-positive KPs, 93% placed on ART (170% of target for identification, 430% for initiation); 93% retention; from 2015-2023, contributed average 95.5% to KPs on ART in supported states	Contributed to Nigeria's progress towards UNAIDS 95-95-95 targets, increased ART coverage and epidemic control among KPs	SFH successfully transformed by addressing health system, capacity, client, and community barriers through OSS establishment, KP-friendly facilities, training, and stakeholder engagement; led to high identification, linkage, and retention rates; lessons emphasize client-centered, community-engaged approaches for sustainability	Stigma and discrimination from healthcare workers and society; criminalization of KP behaviors; health system issues (long waiting times, rigid hours, high costs, inadequate infrastructure); capacity gaps in providers; client barriers (financial, transportation, fear of side effects); community barriers (harassment, false addresses, security challenges); reluctance to HTS; lack of integrated eval…
7	A.E. Nwandu, T. Madubuko, E. Onu, D. Olutola, K. Nike, U. Okonkwo, J. Ilozumba, J. Egharevba, A. Ehoche, J. Apata	2017	Sustainable PEPFAR Funded In Service HIV Training Delivery Models: A Training Impact Evaluation from Nigeria	Nigeria (9 states)	Abstract/Program evaluation	To evaluate the impact of PEPFAR-funded in-service HIV training on healthcare workers' job performance using Kirkpatrick level 3 evaluation	PEPFAR (CDC funded)	CCCRN/University of Maryland training award; establishment of training hubs at tertiary facilities in 9 states for Adult/Pediatric ART, PMTCT, TB/HIV training	Fund the establishment of sustainable training hubs, Trainer of Trainers (ToT), HIV updates, and post-course evaluation of 228 trainees	Training found useful and applicable; 94% of respondents ordered appropriate tests and drugs per guidelines; over 90% reported improvements in ART initiation in PMTCT and adult ART	Demonstrated return on investment of PEPFAR training funds on HIV service delivery capacity and potential population-level outcomes	Post-course evaluation of 228 healthcare workers showed high applicability of training in key HIV tasks; recommends routine level 3 evaluations to identify improvements and barriers	Poor data quality in source documents; barriers to real-world application of training (not specified in detail, but evaluation aimed to identify them)

## Sheet: Reviewer 2
Study ID	Author(s)	Year	Title	State	Type of document	Study aim(s)	Donor Name	Name of Intervention/Program	Role of the funds	Outcome of intervention/Program	Impact	Summary of main findings	Reported challenges/barriers
1	Andrew T. Boyd, Obinna Ogbanufe, Chibuzor Onyenuobi, Ifunanya Mgbakor, Pamela Bachanas, Olayemi Olupitan, Clifford Umeh, Adeoye Adegboye, Golden Owhonda, Solomon Odate, Ibrahim Jahun, Patrick Dakum, Charles Mensah, Jerry Gwamna, Dennis Onotu, Emilio Dirlikov, Michelle Williams-Sherlock, Chukwuemeka Okolo, Tarfa Verinume, Stanley Idakwo, Makshwar U. Kumtap, Tedd Ellerbrock, Mahesh Swaminathan	2021	Scale-up of antiretroviral treatment access among people living with HIV in Rivers State, Nigeria, 2019–2020	Rivers State, Nigeria	Programmatic evaluation (descriptive analytical design with quantitative program data)	The aim of this study was to describe and evaluate the impact of the programme intervention of the Rivers State Antiretroviral Treatment (ART) Surge, a collaboration between the US President’s Emergency Plan for AIDS Relief (PEPFAR) and the State Ministry of Health, to increase HIV case-finding and ART access in Rivers State, the state with the largest ART gap among people living with HIV (PWH) i…	PEPFAR	Rivers State ART Surge	To support the rapid scale-up of HIV case-finding, linkage to care, and antiretroviral therapy (ART) initiation in Rivers State, which had Nigeria's largest ART coverage gap at the time. To enable targeted interventions, including community-based HIV testing, key population services, real-time data use for program adjustments, and stakeholder engagement. To directly fund and track ART for people …	During May 2019—September 2020, the weekly number of newly diagnosed PWH initiated on ART supported by PEPFAR in Rivers State increased from 82 to 1723. During April 2019—September 2020, the total number of PWH on ART supported by PEPFAR statewide increased by 3.8 times, from 26 041 to 99 733.	Dramatic increase in ART coverage — The number of people living with HIV (PLHIV) on ART in PEPFAR-supported facilities rose 3.8-fold, from 26,041 in April 2019 to 99,733 by September 2020. Successful adaptation during COVID-19 — Despite the onset of the pandemic (causing temporary dips in initiations around holidays and lockdowns), the program innovated with community-based outreach, real-time da…	The Rivers State ART Surge implemented six strategies to increase HIV case-finding and ART access, resulting in a significant increase in PWH on ART from 26,041 to 99,733. The intervention used data-driven approaches and stakeholder engagement to achieve scale-up.	COVID-19 disruptions → The pandemic led to reduced facility-based services, holiday-related slowdowns (e.g., sharp drops in ART initiations around late December 2019–early January 2020 and during lockdowns), and barriers to routine HIV care. Need for ongoing adaptation → Retaining PLHIV in care required integration of community-based outreach and innovative service delivery; the study notes poten…
2	Ashley Grosso, Owen Ryan, Khai Hoan Tram, Stefan Baral	2015	Financing the response to HIV among gay men and other men who have sex with men: Case studies from eight diverse countries	Ethiopia, Mozambique, Guyana, India, Nigeria, China, Ukraine, Vietnam	qualitative multiple case study design.	This study characterises financing of HIV programmes for MSM and the impact of criminalisation on levels of funding, using data from five countries that criminalise same-sex sexual practices (Ethiopia, Mozambique, Guyana, India and Nigeria) and three that do not (China, Ukraine and Vietnam).	Global Fund, PEPFAR	HIV programmes for men who have sex with men (MSM)	In this study, the "funds" refer to the international donor financing for HIV programs serving MSM, primarily from two major sources: The Global Fund to Fight AIDS, Tuberculosis and Malaria: The paper analyzes proposals and grants, noting that 11 of 20 reviewed HIV proposals included MSM-specific programs totaling approximately $40 million (about 6% of proposed budgets). The US President's Emerge…	Eleven of 20 HIV proposals to the Global Fund contained programmes for MSM totalling approximately $40 million or 6% of proposed budgets. In six countries providing activity-level data on MSM programming, PEPFAR funding that served this population and others ranged from $23.3 million in FY2007 to $35.4 million in FY2009, representing 0.5–25.9% of overall, non-treatment funding over this period.	Scaled-up service delivery: Donor funds supported MSM-specific HIV prevention, testing, treatment, and care programs, including community outreach, condom distribution, peer education, and linkage to antiretroviral therapy. For instance, Global Fund grants included ~$40 million across 11 HIV proposals (6% of budgets) for MSM activities, enabling targeted interventions in high-burden settings. Epi…	Despite global reductions in new HIV infections, the epidemic among MSM is expanding. The study found low levels of funding for MSM-specific HIV programs in the examined countries, with criminalisation associated with even lower funding, but underfunding persistent across contexts.	Insufficient and inequitable funding levels: MSM programs received only 0.5–25.9% of non-treatment PEPFAR funds (e.g., $23.3–35.4 million annually across six countries) and ~6% of Global Fund HIV budgets, far below needs given MSM's disproportionate epidemic role. Criminalizing countries allocated even less, often due to stigma and legal risks. Influence of criminalization: In five countries (Eth…
3	Florence Femi Odekunle, Raphael Oluseun Odekunle	2016	The impact of the US president's emergency plan for AIDS relief (PEPFAR) HIV and AIDS program on the Nigerian health system	Nigeria	Narrative review (using WHO health system building blocks framework)	To present the impacts of PEPFAR HIV/AIDS program on the Nigerian health system using the World Health Organization (WHO) health system six building blocks.	PEPFAR	PEPFAR HIV/AIDS program	The core role of these funds, as analyzed in the paper, is: To provide substantial external financing for HIV/AIDS prevention, treatment, care, and support in Nigeria, including free antiretroviral therapy (ART) for people living with HIV/AIDS (PLWHA). To strengthen various components of the Nigerian health system through the World Health Organization (WHO) six building blocks framework (service …	The PEPFAR HIV/AIDS program has improved the delivery of prevention and care services for PLWHA. Many lives have been saved through this treatment. The number of PLWHA receiving HAART (highly active antiretroviral therapy) has gone up. The treatment has freed up hospital bed spaces which can be used for other purposes.	Improved service delivery including free ART, counseling, laboratory services, and PMTCT; Increased political awareness and priority for public health; Benefits to health workforce by preserving lives and providing training; Improved information sharing; Improvements in logistics and supply systems for ART and laboratory materials.	The PEPFAR HIV/AIDS program has had noticeable positive and negative impacts on the Nigerian health system across WHO's six building blocks: service delivery, health workforce, information, medical products and technologies, financing, and governance. Positive impacts include improved access to free ART, enhanced health workforce skills and morale, increased resources, better information sharing,…	Donor dependency syndrome; Non-alignment with recipient country's health system; Distraction from coordinated efforts to strengthen health systems; Attention shift from maternal mortality and reproductive health; Top-down planning; Imposition of donor policies like ABC; Brain drain to NGOs; Burden of duplicative reporting; Use of only patented medications increasing costs.
4	David Ochedomi Ekele, Inichinbia Boniface, Bonaventure Michael Ukoaka, Otoyoy Toyo, Uduak Akpan, Esther Nwanja, Kolawole Olatunbosun, Augustine Idemudia, Pius Nwaokoro, Onwah Ogheneuzauzo, Nkemjika Uwakwe, Hope Udokor, Dolapo Ogundehin, Ezekiel James, Abutu Inedu, Adeoye Adegboye, Okezie Onyedinachi, Andy Eyo	2025	Transitioning a large-scale HIV/AIDS treatment program from an international partner to a local Nigerian implementing partner: a before-after early outcomes assessment study	Akwa Ibom and Cross River States, Nigeria	Quantitative before-after design (specifically, a quasi-experimental outcomes assessment)	This study evaluates the transition of a large-scale HIV/AIDS program from an international implementing partner (FHI 360) to a local partner, Excellence Community Education Welfare Scheme (ECEWS) in Nigeria, highlighting the processes and early outcomes.	PEPFAR / USAID	Accelerating Control of the HIV Epidemic in Nigeria (ACE) awards; Meeting Targets and Maintaining Epidemic Control (EpiC) bridge project transitioned to ACE-5 project	In this study, the "funds" refer to the donor financing provided by the U.S. Government through PEPFAR (President's Emergency Plan for AIDS Relief), channeled via USAID. The key roles of these funds are: To support the large-scale HIV/AIDS treatment and care program itself, including prevention, treatment, service delivery, and health system strengthening in Nigeria. To enable the transition proc…	Between January and December 2022, a total of 405,702 individuals were tested for HIV, with 116,138 (29%) tested before and 289,564 (71%) tested after the transition period. The average number of monthly tests increased by 149%, from 19,356 to 48,260 (p = 0.001). On-schedule refill appointments improved significantly post-transition, increasing from 97.8 to 98.2% (p < 0.001). Viral load testing u…	149% increase in monthly HIV tests; 0.4% improvement in on-schedule ART refills; 3% increase in viral load testing uptake immediately post-transition. The transition was successful in maintaining or improving key HIV program outcomes without compromising service accessibility, care quality, or treatment outcomes. Significant increases post-transition in several indicators, including: HIV testing …	The study used a before-after design to evaluate the transition of HIV services from FHI 360 to ECEWS in Akwa Ibom and Cross River States. Key outcomes showed a 149% increase in monthly HIV testing, improved on-schedule ART refills from 97.8% to 98.2%, and viral load testing uptake from 96% to 99%. Success was attributed to comprehensive planning, stakeholder engagement, flexible communication, a…	The study primarily highlights positive early outcomes and emphasizes the role of collaborative planning and a systematic transition approach in avoiding disruptions. No major challenges or negative effects on outcomes were reported in the early post-transition period; the findings underscore the feasibility of seamless transfers to local partners when properly managed.
5	Kazeem Adefemi, Caroline Yates, Olusegun Awolaran, Joseph Bakare	2017	Effects of donor HIV/AIDS funding on primary healthcare delivery in southwest Nigeria: Evidence from hospital administrators	Southwest Nigeria	Qualitative research (semi-structured interviews with hospital administrators)	This qualitative research explores the effect of a decade of donor HIV/AIDS funding on health services in southwest Nigeria, through the experiences of hospital administrators.	PEPFAR, GFATM, World Bank's MAP	Donor-funded HIV/AIDS programs	In this study, the "funds" refer to international donor financing targeted specifically at HIV/AIDS programs in Nigeria, primarily from major sources such as the US President's Emergency Plan for AIDS Relief (PEPFAR) and the Global Fund to Fight AIDS, Tuberculosis and Malaria. The core role of these funds, as examined in the paper, is: To provide large-scale financial support for HIV/AIDS prevent…	HIV programs have improved professional development, contributed toward infrastructural upgrade, and improved the quality and coverage of HIV services.	Positive impacts: Donor funding contributed to infrastructure improvements (e.g., upgrades to facilities and equipment in some hospitals), capacity building through training of healthcare workers, and enhanced availability of HIV-specific services (e.g., free antiretroviral drugs, dedicated HIV clinics, testing, and counseling). These spillovers occasionally benefited general PHC by improving ove…	The study found diverse experiences with HIV/AIDS funding in southwest Nigeria. Major themes include differences in program implementation (incentives, recruitment, lab improvements, infrastructure attitudes); Changes in work practices (increased workload, management strategies, improved HIV service quality); Effects on personnel availability (integration, resource diversion, workload without add…	Differences in incentives causing perceptions of discrimination; Inconsistent support for infrastructure and maintenance; Increased workload without additional personnel or commensurate pay; Loss of staff to better-paying NGO jobs; Diversion of time and resources from other services; Inconsistencies in policies and structures across facilities.
6	Abdulsamad Salihu, Ibrahim Jahun, David Olusegun Oyedeji, Wole Fajemisin, Omokhudu Idogho, Samira Shehu, Aminu Yakubu, Jennifer Anyanti	2025	Scaling up access to antiretroviral treatment for HIV: lessons from a key populations program in Nigeria	Nigeria (multiple states including Lagos, Rivers, Akwa Ibom, Benue, Cross River, Nasarawa, FCT, Oyo, Anambra, Imo, Edo, Gombe, Kano, Enugu)	Programmatic reflection (qualitative case study/description	To share experiences in the transformation of SFH into a comprehensive HIV prevention, treatment, and care service provider as lessons for organizations with similar objectives	PEPFAR (via USAID), Global Fund to Fight AIDS, TB, and Malaria (GFATM)	Key Population Investment Fund (KPIF); SHiPS for MARPs; KP CARE 2; SFH's transformation to comprehensive HIV services including One-Stop Shops (OSS) and KP-friendly facilities	The core role of these funds, as detailed in the paper, is: To address gaps in HIV prevention, treatment, and care for key populations, who face disproportionate HIV burden and barriers (e.g., stigma, criminalization) but low ART coverage in Nigeria. To enable partner organizations like SFH (working with USAID under KPIF) to transition from primarily prevention-focused services to comprehensive H…	Between 2016-2017, identified 4532 HIV-positive KPs, 93% placed on ART (170% of target for identification, 430% for initiation); 93% retention; from 2015-2023, contributed average 95.5% to KPs on ART in supported states	Successful organizational and programmatic transformation, allowing SFH to expand services beyond prevention to include ART initiation, retention in care, and support for viral suppression among underserved KPs. Improved equity in HIV treatment coverage for KPs, who face disproportionate HIV burden but historically low access due to barriers. Higher retention rates compared to similar programs (e…	SFH successfully transformed by addressing health system, capacity, client, and community barriers through OSS establishment, KP-friendly facilities, training, and stakeholder engagement; led to high identification, linkage, and retention rates; lessons emphasize client-centered, community-engaged approaches for sustainability	Stigma and discrimination from healthcare workers and society; criminalization of KP behaviors; health system issues (long waiting times, rigid hours, high costs, inadequate infrastructure); capacity gaps in providers; client barriers (financial, transportation, fear of side effects); community barriers (harassment, false addresses, security challenges); reluctance to HTS; lack of integrated eval…
7	A.E. Nwandu, T. Madubuko, E. Onu, D. Olutola, K. Nike, U. Okonkwo, J. Ilozumba, J. Egharevba, A. Ehoche, J. Apata	2017	Sustainable PEPFAR Funded In Service HIV Training Delivery Models: A Training Impact Evaluation from Nigeria	Nigeria (9 states)	Impact evaluation (mixed-methods or quantitative assessment of training outcomes)	To evaluate the impact of PEPFAR-funded in-service HIV training on healthcare workers' job performance using Kirkpatrick level 3 evaluation	PEPFAR (CDC funded)	CCCRN/University of Maryland training award; establishment of training hubs at tertiary facilities in 9 states for Adult/Pediatric ART, PMTCT, TB/HIV training	In this study, the "funds" refer to the financial resources provided by the US President's Emergency Plan for AIDS Relief (PEPFAR), channeled through implementing partners such as the Institute of Human Virology Nigeria (part of the University of Maryland School of Medicine program). The core role of these funds, as evaluated in the abstract, is: To support in-service HIV training delivery models…	Training found useful and applicable; 94% of respondents ordered appropriate tests and drugs per guidelines; over 90% reported improvements in ART initiation in PMTCT and adult ART	Positive contributions to workforce capacity: PEPFAR-funded IST has trained a wide range of health workers (e.g., doctors, nurses, laboratory staff, community workers) in HIV/AIDS care, prevention, treatment, and related areas since the mid-2000s. This has boosted skills, morale, and retention of HIV providers, contributing to scaled-up service delivery and improved quality of HIV care in resourc…	Post-course evaluation of 228 healthcare workers showed high applicability of training in key HIV tasks; recommends routine level 3 evaluations to identify improvements and barriers	Sustainability emerged as a key issue amid potential reductions in external (PEPFAR) funding and the need for long-term viability. Heavy reliance on donor financing raised concerns about ongoing dependency, with risks of program disruption if funding declines. The evaluation highlighted the need to identify and promote cost-effective, locally adaptable models that could transition toward greater …
