# Supplementary material
Source: Research Square preprint supplement (doi:10.21203/rs.3.rs-9192593/v1)
Supplement: Supplementary file 2 [file a6b2807e15edf624c1393d3d.docx]

# **Search Strategy**

Using Scopus as the database source, the following search terms were used in combination with the appropriate Boolean logic. This strategy was adapted for the additional databases included:

(“donor funds” OR “HIV funding” OR “AIDS funding” OR “HIV grants” OR “HIV donations” OR “HIV contributions” OR “HIV financing” OR “foreign aid” OR “global fund” OR “PEPFAR” OR “UNAIDS” OR “World Bank” OR “WHO” OR “Bill and Melinda Gates Foundation”) AND (“HIV interventions” OR “HIV programs” OR “HIV support” OR “HIV treatment” OR “HIV care” OR “HIV prevention” OR “HIV management” OR “HIV-related programs” OR “antiretroviral therapy” OR “ART” OR “PrEP” OR “PEP” OR “HIV control measures”) AND (“impacts” OR “outcomes” OR “effectiveness” OR “results”) AND (“challenges” OR “barriers” OR “limitations” OR “sustainability”) AND (“Nigeria”).
